# Supplementary material for: ACE and Type 2 Diabetes Risk: A Mendelian Randomization Study
Source: Oxford University Press journal article supplement (doi:10.2337/dc19-1973), 2020-02-04
Supplement: dc191973supplementarydata.pdf [file dc191973supplementarydata.pdf]

## SUPPLEMENTARY DATA

*Supplement to:*

Pigeyre M, Sjaarda J, Chong M, Hess S, Bosch J, Yusuf S, Gerstein H, Paré G. Angiotensin-converting enzyme and type 2 diabetes risk: a Mendelian randomization study

### TABLE OF CONTENTS

|                                                                                                                                                                                                   |    |
|---------------------------------------------------------------------------------------------------------------------------------------------------------------------------------------------------|----|
| Part 1 - Additional materials                                                                                                                                                                     | 2  |
| Supplementary Material 1. Genotyping, imputation procedures, and quality control steps                                                                                                            | 2  |
| Supplementary Material 2. Design of meta-analysis of ACE inhibitors vs. placebo RCTs                                                                                                              | 3  |
| Supplementary Material 3. Standardization of the <i>ACE GRS</i> for mean arterial blood pressure change                                                                                           | 5  |
| Part 2 - Additional tables                                                                                                                                                                        | 6  |
| Supplementary Table 1. Studies including in DIAGRAM consortium                                                                                                                                    | 6  |
| Supplementary Table 2. List of biomarkers                                                                                                                                                         | 7  |
| Supplementary Table 3. Characteristics of ORIGIN participants                                                                                                                                     | 13 |
| Supplementary Table 4. Single nucleotide polymorphisms associated with ACE serum levels and included in the Mendelian randomization analysis of type 2 diabetes risk                              | 14 |
| Supplementary Table 5. Characteristics of UK Biobank participants                                                                                                                                 | 15 |
| Supplementary Table 6. MR associations of ACE concentrations with body mass index and 15 glucose- and insulin-related traits available in the GIANT (16) and the MAGIC consortia (17)(18)(19)(20) | 16 |
| Part 3 - Additional figures                                                                                                                                                                       | 17 |
| Supplementary Figure 1. Association of <i>ACE GRS</i> with ACE serum levels in ORIGIN participants                                                                                                | 17 |
| Supplementary Figure 2. Association of ACE concentration change with risk of type 2 diabetes using a two-sample MR                                                                                | 18 |
| Supplementary Figure 3. Forest plot of the association of ACE inhibitors and new-onset type 2 diabetes (T2D) risk                                                                                 | 19 |

## SUPPLEMENTARY DATA

### Part 1 - Additional materials

#### Supplementary Material 1. Genotyping, imputation procedures, and quality control steps

##### *ORIGIN cohort*

Individuals were genotyped on the HumanCore Exome chip (Illumina). Quality control steps were performed using PLINK (1) and GCTA (Genome-wide Complex Trait Analysis) (2). Imputation was performed using IMPUTE2 software (3) with 1000 Genomes Project data (4) as the reference panel. SNPs imputed with low certainty were removed (INFOscore < 0.6).

##### *UK Biobank cohort*

Individuals were genotyped using either the UK Biobank Array or the UK BiLEVE array. Phasing and imputation were performed using SHAPEIT3 (5) and IMPUTE2 (3), respectively, against a combined haplotype reference panel including UK10K (6) and 1000 Genomes Phase 3 (4). In addition to excluding samples belonging to the standard UK Biobank genomic analysis exclusion list, further quality control of samples was performed. Related samples, samples with low call rates (< 99%), inconsistent reported sex versus genetic sex, non-British ancestry, or quality control failure in the UK BiLEVE array were removed. Variants with low call rates (< 95%), low imputation quality (INFOscore < 0.6), low minor allele frequency (MAF < 0.01), or suggestive evidence for poor genotype calling (Hardy Weinberg Equilibrium  $P < 10^{-6}$ ) were also removed.

## **Methods**

### *Eligibility criteria*

Studies were considered for inclusion if they met the following criteria:

- 1) type of study design was randomized, doubled-blind, controlled trials (RCTs);
- 2) compared an ACEI (i.e. benazepril, captopril, enalapril, fosinopril, lisinopril, moexipril, perindopril, quinapril, ramipril, trandolapril) with placebo. There were no restrictions based on the frequency, dosage, length or duration of the ACE inhibitor intervention;
- 3) reporting the incidence of new-onset diabetes;
- 4) conducted on adult participants aged  $\geq 18$  years;
- 5) published in English.

### *Information sources and search*

We searched PubMed using the MeSH terms: (antihypertensive agents [MeSH Terms] OR angiotensin-converting enzyme inhibitors[MeSH Terms]) AND diabetes mellitus[MeSH Terms] AND (randomized controlled trial[MeSH Terms] OR meta-analysis[MeSH Terms]). This search was applied to PubMed on May 9, 2019.

### *Study selection, data collection process and data items*

Based on the results of the search strategy, titles and abstracts for each reference were examined independently by two reviewers (MP and GP). Relevant studies obtained from the full-text screening phase were reviewed for methodological quality and disagreements were resolved through discussion between reviewers. The following information was extracted from each included trial: (1) characteristics of the study participants (i.e. age, sex, body mass index, ethnicity or country of origin); (2) characteristics of the study (i.e., study design, sample size, median follow-up period); (3) characteristics of the intervention (i.e. ACE inhibitor name, dose and frequency of the intervention, blood pressure-lowering effect); and (4) characteristics of the outcome measures (ie, criteria for defining diabetes, number of new-onset diabetes during follow-up).

### *Summary measures*

The treatment effect on diabetes incidence was expressed as an odds ratio (OR) with the 95% CI and p-value.

### *Summary results*

Random effects model was used for statistical analysis due to wide clinical and methodological variability across the trials. Heterogeneity was tested using restricted maximum-likelihood estimation (REML) as recommended for meta-analysis with a small number of included studies (7), and inconsistency ( $I^2$ ) was measured by assessing the percentage of total variation of the effects of ACE inhibitors across studies due to heterogeneity. A low p-value ( $p < 0.10$ ) or  $I^2$  of  $> 30\%$  provided evidence of heterogeneity of intervention effects.

## **Results**

### *Study characteristics*

A total of 6 studies were identified for inclusion in this review. The structured literature search of PubMed databases derived a total of 541 citations and 18 additional citations revealed by scrutinizing the reference lists of identified studies. Of these, 510 studies were discarded because after reviewing the abstracts it appeared that these papers clearly did not meet our inclusion criteria. The full-text of the remaining 49 citations were examined in more detail. It appeared that 41 articles did not meet the inclusion criteria. Of the included articles, there were six RCTs (8)(9)(10)(11)(12)(13) enrolling a total of 31,200 participants. (see below the flow diagram of the study selection process).

## SUPPLEMENTARY DATA

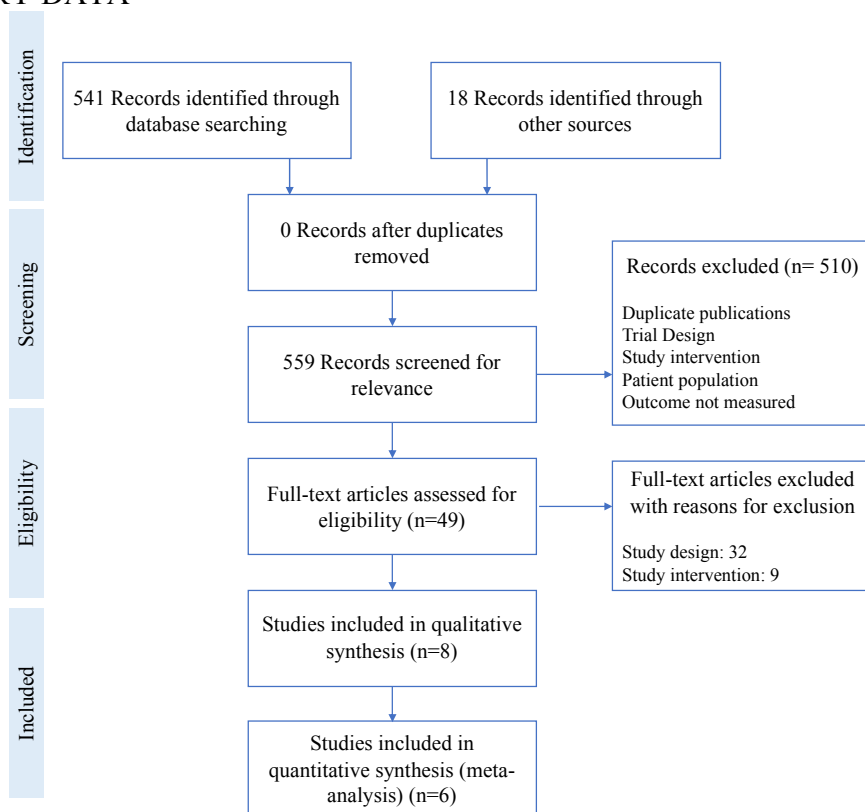

Study flow diagram for the meta-analysis of ACE inhibitors vs. placebo

## SUPPLEMENTARY DATA

### **Supplementary Material 3. Standardization of the *ACE GRS* for mean arterial blood pressure change**

The *ACE GRS* was standardized to be given in genetically determined ACE concentration equivalent to a 2.4 mmHg lower MAP. We estimated the relationship between MAP and *ACE GRS* in the UK Biobank participants lacking type 2 diabetes (N=326,508), using a linear regression model, in which MAP (measured in mmHg) was the dependent variable and *ACE GRS* was the independent variable of interest. We next used the regression coefficient ( $\beta$ ) obtained from this linear model to rescale the *ACE GRS* such that *ACE GRS<sub>standardized</sub>* was equal to the product of *ACE GRS*\* $\beta$ \*2.4, such that 1 higher score unit corresponded to a genetically ACE concentration change associated with a 2.4 mmHg lower MAP. Then, we performed a logistic regression to estimate the association between type 2 diabetes prevalence (dependent variable) and *ACE GRS<sub>standardized</sub>* (independent variable) in the UK Biobank participants. This model was adjusted for age, sex, ACE inhibitor usage at baseline, and the first ten principal components.

SUPPLEMENTARY DATA  
**Part 2 - Additional tables**

**Supplementary Table 1. Studies including in DIAGRAM consortium**

| <b>Study name</b>             | <b>Study design</b>                       | <b>Ethnicity</b>            | <b>Total sample size (N [cases / controls])</b> |
|-------------------------------|-------------------------------------------|-----------------------------|-------------------------------------------------|
| ARIC                          | population-based                          | White European              | 755/7009                                        |
| BioMe <sup>^</sup> (Affy)     | population-based                          | White European              | 132/455                                         |
| BioMe <sup>^</sup> (Illumina) | population-based                          | White European              | 255/1647                                        |
| deCODE                        | population-based                          | White European              | 7339/83049                                      |
| DGDG                          | Case-control                              | White European              | 679/697                                         |
| DGI                           | T2D Case-Control                          | White European              | 1023/1074                                       |
| EGCUT-370                     | population-based                          | White European              | 80/1768                                         |
| EGCUT-OMNI                    | population-based                          | White European              | 389/6013                                        |
| EPIC-InterAct                 | case-control nested into population-based | White European              | 4624/4668                                       |
| FHS                           | family-based                              | White European<br>Americans | 673/7660                                        |
| FUSION                        | Case-control                              | White European              | 1161/1174                                       |
| GoDARTS                       | Case-Control                              | White European              | 3298/2643                                       |
| HPFS                          | population-based                          | White European              | 1124/1298                                       |
| KORAgEn                       | population-based                          | White European              | 347/1550                                        |
| NHS                           | population-based                          | White European              | 1467/1754                                       |
| PIVUS                         | population-based                          | White European              | 111/838                                         |
| RS-I                          | population-based                          | White European              | 654/5219                                        |
| ULSAM                         | population-based                          | White European              | 166/953                                         |
| WTCCC                         | population-based                          | White European              | 1924/2938                                       |

Adapted from Scott et al. (14)

SUPPLEMENTARY DATA

Supplementary Table 2. List of biomarkers

|    | <b>Biomarker</b>                  | <b>Gene</b>     | <b>Inter-Run CV at Intermediate Concentrations</b> |
|----|-----------------------------------|-----------------|----------------------------------------------------|
| 1  | 6Ckine                            | <i>CCL21</i>    | 13%                                                |
| 2  | Adiponectin                       | <i>ADIPOQ</i>   | 4%                                                 |
| 3  | Adrenomedullin                    | <i>ADM</i>      | 7%                                                 |
| 4  | Agouti-Related Protein            | <i>AGRP</i>     | 7%                                                 |
| 5  | Aldose Reductase                  | <i>AKR1B1</i>   | 11%                                                |
| 6  | Alpha-1-acid glycoprotein 1       | <i>ORM1</i>     | 15%                                                |
| 7  | Alpha-1-Antichymotrypsin          | <i>SERPINA3</i> | 6%                                                 |
| 8  | Alpha-1-Antitrypsin               | <i>SERPINA1</i> | 14%                                                |
| 9  | Alpha-1-Microglobulin             | <i>AMBP</i>     | 5%                                                 |
| 10 | Alpha-2-Macroglobulin             | <i>A2M</i>      | 6%                                                 |
| 11 | Angiogenin                        | <i>ANG</i>      | 10%                                                |
| 12 | Angiopoietin-2                    | <i>ANGPT2</i>   | 6%                                                 |
| 13 | Angiopoietin-related protein 3    | <i>ANGPTL3</i>  | 8%                                                 |
| 14 | Angiotensin-Converting Enzyme     | <i>ACE</i>      | 12%                                                |
| 15 | Angiotensinogen                   | <i>AGT</i>      | 6%                                                 |
| 16 | Antithrombin-III                  | <i>SERPINC1</i> | 6%                                                 |
| 17 | Apolipoprotein A-I                | <i>APOA1</i>    | 10%                                                |
| 18 | Apolipoprotein A-II               | <i>APOA2</i>    | 8%                                                 |
| 19 | Apolipoprotein A-IV               | <i>APOA4</i>    | 9%                                                 |
| 20 | Apolipoprotein B                  | <i>APOB</i>     | 9%                                                 |
| 21 | Apolipoprotein C-I                | <i>APOC1</i>    | 9%                                                 |
| 22 | Apolipoprotein C-III              | <i>APOC3</i>    | 20%                                                |
| 23 | Apolipoprotein D                  | <i>APOD</i>     | 18%                                                |
| 24 | Apolipoprotein E                  | <i>APOE</i>     | 20%                                                |
| 25 | Apolipoprotein H                  | <i>APOH</i>     | 12%                                                |
| 26 | Apolipoprotein(a)                 | <i>LPA</i>      | 16%                                                |
| 27 | AXL Receptor Tyrosine Kinase      | <i>AXL</i>      | 10%                                                |
| 28 | B cell-activating factor          | <i>TNFSF13B</i> | 9%                                                 |
| 29 | B Lymphocyte Chemoattractant      | <i>CXCL13</i>   | 10%                                                |
| 30 | Beta Amyloid 1-40                 | <i>APP</i>      | 13%                                                |
| 31 | Beta-2-Microglobulin              | <i>B2M</i>      | 13%                                                |
| 32 | Brain-Derived Neurotrophic Factor | <i>BDNF</i>     | 5%                                                 |
| 33 | C-Peptide                         | <i>INS</i>      | 4%                                                 |
| 34 | C-Reactive Protein                | <i>CRP</i>      | 13%                                                |
| 35 | Cathepsin D                       | <i>CTSD</i>     | 9%                                                 |
| 36 | CD 40 antigen                     | <i>CD40</i>     | 8%                                                 |
| 37 | CD163                             | <i>CD163</i>    | 11%                                                |
| 38 | CD40 Ligand                       | <i>CD40LG</i>   | 9%                                                 |
| 39 | CD5 Antigen-like                  | <i>CD5L</i>     | 14%                                                |
| 40 | Cellular Fibronectin              | <i>FN1</i>      | 17%                                                |
| 41 | Chemerin                          | <i>RARRES2</i>  | 4%                                                 |
| 42 | Chemokine CC-4                    | <i>CCR4</i>     | 7%                                                 |
| 43 | Chromogranin-A                    | <i>CHGA</i>     | 7%                                                 |
| 44 | Clusterin                         | <i>CLU</i>      | 10%                                                |

SUPPLEMENTARY DATA

|    |                                                     |                                                                                                                   |     |
|----|-----------------------------------------------------|-------------------------------------------------------------------------------------------------------------------|-----|
| 45 | Collagen IV                                         | <i>COL4A1, COL4A2, COL4A3, COL4A4, COL4A5, COL4A6</i>                                                             | 14% |
| 46 | Complement C3                                       | <i>C3</i>                                                                                                         | 10% |
| 47 | Complement Factor H Related Protein 1               | <i>CFHR1</i>                                                                                                      | 9%  |
| 48 | Cortisol                                            | <i>NA</i>                                                                                                         | 8%  |
| 49 | Creatine Kinase-MB                                  | <i>CKM, CKB</i>                                                                                                   | 12% |
| 50 | Cystatin-C                                          | <i>CST3</i>                                                                                                       | 8%  |
| 51 | E-Selectin                                          | <i>SELE</i>                                                                                                       | 5%  |
| 52 | EN-RAGE                                             | <i>S100A12</i>                                                                                                    | 4%  |
| 53 | Endoglin                                            | <i>ENG</i>                                                                                                        | 8%  |
| 54 | Endostatin                                          | <i>COL18A1</i>                                                                                                    | 10% |
| 55 | Eotaxin-1                                           | <i>CCL11</i>                                                                                                      | 11% |
| 56 | Eotaxin-2                                           | <i>CCL24</i>                                                                                                      | 9%  |
| 57 | Eotaxin-3                                           | <i>CCL26</i>                                                                                                      | 16% |
| 58 | Epithelial-Derived Neutrophil-Activating Protein 78 | <i>CXCL5</i>                                                                                                      | 12% |
| 59 | Erythropoietin                                      | <i>EPO</i>                                                                                                        | 10% |
| 60 | Ezrin                                               | <i>EZR</i>                                                                                                        | 10% |
| 61 | Factor VII                                          | <i>F7</i>                                                                                                         | 4%  |
| 62 | Fas Ligand                                          | <i>FASLG</i>                                                                                                      | 8%  |
| 63 | FASLG Receptor                                      | <i>TNFRSF6B</i>                                                                                                   | 2%  |
| 64 | Fatty Acid-Binding Protein adipocyte                | <i>FABP4</i>                                                                                                      | 6%  |
| 65 | Fatty Acid-Binding Protein liver                    | <i>FABP1</i>                                                                                                      | 12% |
| 66 | Ferritin                                            | <i>FTL, FTH1</i>                                                                                                  | 6%  |
| 67 | Fetuin-A                                            | <i>AHSG</i>                                                                                                       | 17% |
| 68 | Fibroblast Growth Factor 21                         | <i>FGF21</i>                                                                                                      | 12% |
| 69 | Fibroblast growth factor 23                         | <i>FGF23</i>                                                                                                      | 9%  |
| 70 | Fibulin-1C                                          | <i>FBLN1</i>                                                                                                      | 9%  |
| 71 | Ficolin-3                                           | <i>FCN3</i>                                                                                                       | 7%  |
| 72 | Follicle-Stimulating Hormone                        | <i>FSHB, CGA</i>                                                                                                  | 16% |
| 73 | Galectin-3                                          | <i>LGALS3</i>                                                                                                     | 8%  |
| 74 | Gastric inhibitory polypeptide                      | <i>GIP</i>                                                                                                        | 12% |
| 75 | Gelsolin                                            | <i>GSN</i>                                                                                                        | 12% |
| 76 | Glucagon-like Peptide 1 total                       | <i>GCG</i>                                                                                                        | 7%  |
| 77 | Glucose-6-phosphate Isomerase                       | <i>GPI</i>                                                                                                        | 7%  |
| 78 | Glutathione S-Transferase alpha                     | <i>GSTA1, GSTA2, GSTA3, GSTA4, GSTA5</i>                                                                          | 11% |
| 79 | Glycogen phosphorylase isoenzyme BB                 | <i>PYGB</i>                                                                                                       | 6%  |
| 80 | Granulocyte Colony-Stimulating Factor               | <i>CSF3</i>                                                                                                       | 6%  |
| 81 | Growth differentiation factor 15                    | <i>GDF15</i>                                                                                                      | 10% |
| 82 | Growth Hormone                                      | <i>GH1, GH2</i>                                                                                                   | 9%  |
| 83 | Growth-Regulated alpha protein                      | <i>CXCL1</i>                                                                                                      | 5%  |
| 84 | Haptoglobin                                         | <i>HP</i>                                                                                                         | 8%  |
| 85 | Heat-Shock protein 70                               | <i>HSPA1A, HSPA1B, HSPA1L, HSPA2, HSPA4, HSPA4L, HSPA5, HSPA6, HSPA8, HSPA9, HSPA12A, HSPA12B, HSPA13, HSPA14</i> | 8%  |
| 86 | Hemopexin                                           | <i>HPX</i>                                                                                                        | 9%  |



SUPPLEMENTARY DATA

|     |                                                                 |                    |     |
|-----|-----------------------------------------------------------------|--------------------|-----|
| 87  | Hepatocyte Growth Factor                                        | <i>HGF</i>         | 18% |
| 88  | Hepatocyte Growth Factor receptor                               | <i>MET</i>         | 13% |
| 89  | Hepsin                                                          | <i>HPN</i>         | 4%  |
| 90  | Human Epidermal Growth Factor Receptor 2                        | <i>ERBB2</i>       | 2%  |
| 91  | Immunoglobulin A                                                | <i>IGH</i>         | 11% |
| 92  | Immunoglobulin E                                                | <i>IGH</i>         | 4%  |
| 93  | Immunoglobulin M                                                | <i>IGH</i>         | 19% |
| 94  | Insulin                                                         | <i>INS</i>         | 7%  |
| 95  | Insulin-like Growth Factor Binding Protein 4                    | <i>IGFBP4</i>      | 6%  |
| 96  | Insulin-like Growth Factor Binding Protein 5                    | <i>IGFBP5</i>      | 8%  |
| 97  | Insulin-like Growth Factor Binding Protein 6                    | <i>IGFBP6</i>      | 17% |
| 98  | Insulin-like Growth Factor I                                    | <i>IGF1</i>        | 8%  |
| 99  | Insulin-like Growth Factor-Binding Protein 1                    | <i>IGFBP1</i>      | 8%  |
| 100 | Insulin-like Growth Factor-Binding Protein 2                    | <i>IGFBP2</i>      | 7%  |
| 101 | Insulin-like Growth Factor-Binding Protein 3                    | <i>IGFBP3</i>      | 9%  |
| 102 | Intercellular Adhesion Molecule 1                               | <i>ICAM1</i>       | 7%  |
| 103 | Interferon gamma                                                | <i>IFNG</i>        | 11% |
| 104 | Interferon gamma Induced Protein 10                             | <i>CXCL10</i>      | 8%  |
| 105 | Interferon-inducible T-cell alpha chemoattractant               | <i>CXCL11</i>      | 16% |
| 106 | Interleukin-1 beta                                              | <i>IL1B</i>        | 10% |
| 107 | Interleukin-1 receptor antagonist                               | <i>IL1RN</i>       | 6%  |
| 108 | Interleukin-10                                                  | <i>IL10</i>        | 8%  |
| 109 | Interleukin-12 Subunit p40                                      | <i>IL12B</i>       | 7%  |
| 110 | Interleukin-16                                                  | <i>IL16</i>        | 5%  |
| 111 | Interleukin-17                                                  | <i>IL17A</i>       | 6%  |
| 112 | Interleukin-18                                                  | <i>IL18</i>        | 9%  |
| 113 | Interleukin-2                                                   | <i>IL2</i>         | 8%  |
| 114 | Interleukin-2 receptor alpha                                    | <i>IL2RA</i>       | 2%  |
| 115 | Interleukin-23                                                  | <i>IL23A,IL12B</i> | 9%  |
| 116 | Interleukin-6                                                   | <i>IL6</i>         | 6%  |
| 117 | Interleukin-6 receptor                                          | <i>IL6R</i>        | 6%  |
| 118 | Interleukin-6 receptor subunit beta                             | <i>IL6ST</i>       | 9%  |
| 119 | Interleukin-7                                                   | <i>IL7</i>         | 6%  |
| 120 | Interleukin-8                                                   | <i>CXCL8</i>       | 8%  |
| 121 | Kallikrein 5                                                    | <i>KLK5</i>        | 14% |
| 122 | Kidney Injury Molecule-1                                        | <i>HAVCR1</i>      | 9%  |
| 123 | Lactoferrin                                                     | <i>LTF</i>         | 9%  |
| 124 | Lactoylglutathione lyase                                        | <i>GLO1</i>        | 6%  |
| 125 | Latency-Associated Peptide of Transforming Growth Factor beta 1 | <i>LTBP1</i>       | 7%  |
| 126 | Lectin-Like Oxidized LDL Receptor 1                             | <i>OLR1</i>        | 4%  |

SUPPLEMENTARY DATA

|     |                                                    |                  |     |
|-----|----------------------------------------------------|------------------|-----|
| 127 | Leptin                                             | <i>LEP</i>       | 6%  |
| 128 | Leptin Receptor                                    | <i>LEPR</i>      | 11% |
| 129 | Leucine-rich alpha-2-glycoprotein                  | <i>LRG1</i>      | 4%  |
| 130 | Luteinizing Hormone                                | <i>LHB,CGA</i>   | 6%  |
| 131 | Macrophage Colony-Stimulating Factor 1             | <i>CSF1</i>      | 5%  |
| 132 | Macrophage inflammatory protein 3 beta             | <i>CCL19</i>     | 10% |
| 133 | Macrophage Inflammatory Protein-1 alpha            | <i>CCL3</i>      | 7%  |
| 134 | Macrophage Inflammatory Protein-1 beta             | <i>CCL4</i>      | 6%  |
| 135 | Macrophage Inflammatory Protein-3 alpha            | <i>CCL20</i>     | 4%  |
| 136 | Macrophage Migration Inhibitory Factor             | <i>MIF</i>       | 6%  |
| 137 | Macrophage-Derived Chemokine                       | <i>CCL22</i>     | 9%  |
| 138 | Macrophage-Stimulating Protein                     | <i>MST1</i>      | 6%  |
| 139 | Matrix Metalloproteinase-1                         | <i>MMP1</i>      | 12% |
| 140 | Matrix Metalloproteinase-10                        | <i>MMP10</i>     | 11% |
| 141 | Matrix Metalloproteinase-3                         | <i>MMP3</i>      | 9%  |
| 142 | Matrix Metalloproteinase-7                         | <i>MMP7</i>      | 12% |
| 143 | Matrix Metalloproteinase-9                         | <i>MMP9</i>      | 6%  |
| 144 | Matrix Metalloproteinase-9 total                   | <i>MMP9</i>      | 14% |
| 145 | Mesothelin                                         | <i>MSLN</i>      | 10% |
| 146 | Methylglyoxal                                      | <i>NA</i>        | 9%  |
| 147 | MHC class I chain-related protein A                | <i>MICA</i>      | 5%  |
| 148 | Monocyte Chemotactic Protein 1                     | <i>CCL2</i>      | 5%  |
| 149 | Monocyte Chemotactic Protein 2                     | <i>CCL8</i>      | 6%  |
| 150 | Monocyte Chemotactic Protein 3                     | <i>CCL7</i>      | 7%  |
| 151 | Monocyte Chemotactic Protein 4                     | <i>CCL13</i>     | 7%  |
| 152 | Monokine Induced by Gamma Interferon               | <i>CXCL9</i>     | 10% |
| 153 | Myeloid Progenitor Inhibitory Factor 1             | <i>CCL23</i>     | 4%  |
| 154 | Myeloperoxidase                                    | <i>MPO</i>       | 16% |
| 155 | Myoglobin                                          | <i>MB</i>        | 6%  |
| 156 | N-terminal prohormone of brain natriuretic peptide | <i>NPPB</i>      | 5%  |
| 157 | Neuronal Cell Adhesion Molecule                    | <i>NRCAM</i>     | 5%  |
| 158 | Neuropilin-1                                       | <i>NRP1</i>      | 11% |
| 159 | Neutrophil Activating Peptide 2                    | <i>PPBP</i>      | 7%  |
| 160 | Neutrophil Gelatinase-Associated Lipocalin         | <i>LCN2</i>      | 12% |
| 161 | Omentin                                            | <i>ITLNI</i>     | 11% |
| 162 | Osteocalcin                                        | <i>BGLAP</i>     | 9%  |
| 163 | Osteopontin                                        | <i>SPP1</i>      | 9%  |
| 164 | Osteoprotegerin                                    | <i>TNFRSF11B</i> | 9%  |
| 165 | P-Selectin                                         | <i>SELP</i>      | 6%  |
| 166 | Pancreatic Polypeptide                             | <i>PPY</i>       | 13% |
| 167 | Paraoxanase-1                                      | <i>PONI</i>      | 16% |

SUPPLEMENTARY DATA

|     |                                                  |                             |     |
|-----|--------------------------------------------------|-----------------------------|-----|
| 168 | Pentraxin-3                                      | <i>PTX3</i>                 | 12% |
| 169 | Pepsinogen I                                     | <i>NA</i>                   | 6%  |
| 170 | Peptide YY                                       | <i>PYY</i>                  | 7%  |
| 171 | Periostin                                        | <i>POSTN</i>                | 11% |
| 172 | Peroxiredoxin-4                                  | <i>PRDX4</i>                | 8%  |
| 173 | Phosphoserine Aminotransferase                   | <i>PSAT1</i>                | 7%  |
| 174 | Pigment Epithelium Derived Factor                | <i>SERPINF1</i>             | 7%  |
| 175 | Plasminogen Activator Inhibitor 1                | <i>SERPINE1</i>             | 8%  |
| 176 | Platelet-Derived Growth Factor BB                | <i>PDGFB</i>                | 6%  |
| 177 | Progesterone                                     | <i>NA</i>                   | 8%  |
| 178 | Progranulin                                      | <i>GRN</i>                  | 6%  |
| 179 | Proinsulin Intact                                | <i>INS</i>                  | 5%  |
| 180 | Proinsulin Total                                 | <i>INS</i>                  | 6%  |
| 181 | Prolactin                                        | <i>PRL</i>                  | 15% |
| 182 | Prostasin                                        | <i>PRSS8</i>                | 6%  |
| 183 | Prostatic Acid Phosphatase                       | <i>ACPP</i>                 | 11% |
| 184 | Protein S100-A4                                  | <i>S100A4</i>               | 7%  |
| 185 | Protein S100-A6                                  | <i>S100A6</i>               | 8%  |
| 186 | Pulmonary and Activation-Regulated Chemokine     | <i>CCL18</i>                | 10% |
| 187 | Receptor for advanced glycosylation end products | <i>AGER</i>                 | 5%  |
| 188 | Receptor tyrosine-protein kinase erbB-3          | <i>ERBB3</i>                | 10% |
| 189 | Resistin                                         | <i>RETN</i>                 | 8%  |
| 190 | Retinol-binding protein 4                        | <i>RBP4</i>                 | 13% |
| 191 | Secreted frizzled-related protein 4              | <i>SFRP4</i>                | 12% |
| 192 | Selenoprotein P                                  | <i>SEPP1</i>                | 6%  |
| 193 | Serotransferrin                                  | <i>TF</i>                   | 8%  |
| 194 | Serum Amyloid A Protein                          | <i>SAA1,SAA2,SAA4,SAA3P</i> | 11% |
| 195 | Serum Amyloid P-Component                        | <i>APCS</i>                 | 10% |
| 196 | Serum Glutamic Oxaloacetic Transaminase          | <i>GOT1,GOT2</i>            | 12% |
| 197 | Sex Hormone-Binding Globulin                     | <i>SHBG</i>                 | 14% |
| 198 | Sortilin                                         | <i>SORT1</i>                | 5%  |
| 199 | ST2                                              | <i>IL1RL1</i>               | 11% |
| 200 | Stem Cell Factor                                 | <i>KITLG</i>                | 6%  |
| 201 | Stromal cell-derived factor-1                    | <i>CXCL12</i>               | 10% |
| 202 | Superoxide Dismutase 1 soluble                   | <i>SOD1</i>                 | 7%  |
| 203 | T Lymphocyte-Secreted Protein I-309              | <i>CCL1</i>                 | 11% |
| 204 | T-Cell-Specific Protein RANTES                   | <i>CCL5</i>                 | 16% |
| 205 | Tamm-Horsfall Urinary Glycoprotein               | <i>UMOD</i>                 | 17% |
| 206 | Tenascin-C                                       | <i>TNC</i>                  | 4%  |
| 207 | Testosterone Total                               | <i>NA</i>                   | 7%  |
| 208 | Tetranectin                                      | <i>CLEC3B</i>               | 15% |
| 209 | Thrombin-activable fibrinolysis inhibitor        | <i>CPB2</i>                 | 5%  |

SUPPLEMENTARY DATA

|            |                                                    |                  |     |
|------------|----------------------------------------------------|------------------|-----|
| <b>210</b> | Thrombomodulin                                     | <i>THBD</i>      | 7%  |
| <b>211</b> | Thrombospondin-1                                   | <i>THBS1</i>     | 14% |
| <b>212</b> | Thyroid-Stimulating Hormone                        | <i>TSHB,CGA</i>  | 8%  |
| <b>213</b> | Thyroxine-Binding Globulin                         | <i>SERPINA7</i>  | 15% |
| <b>214</b> | Tissue Inhibitor of Metalloproteinases 1           | <i>TIMP1</i>     | 7%  |
| <b>215</b> | Tissue type Plasminogen activator                  | <i>PLAT</i>      | 5%  |
| <b>216</b> | TNF-Related Apoptosis-Inducing Ligand Receptor 3   | <i>TNFRSF10C</i> | 7%  |
| <b>217</b> | Transthyretin                                      | <i>TTR</i>       | 8%  |
| <b>218</b> | Trefoil Factor 3                                   | <i>TFF3</i>      | 7%  |
| <b>219</b> | Troponin                                           |                  | 4%  |
| <b>220</b> | Tumor Necrosis Factor alpha                        | <i>TNF</i>       | 5%  |
| <b>221</b> | Tumor necrosis factor receptor 2                   | <i>TNFRSF1B</i>  | 7%  |
| <b>222</b> | Tumor Necrosis Factor Receptor I                   | <i>TNFRSF1A</i>  | 8%  |
| <b>223</b> | Tyrosine kinase with Ig and EGF homology domains 2 | <i>TIE1</i>      | 7%  |
| <b>224</b> | Urokinase-type Plasminogen Activator               | <i>PLAU</i>      | 9%  |
| <b>225</b> | Urokinase-type plasminogen activator receptor      | <i>PLAUR</i>     | 8%  |
| <b>226</b> | Vascular Cell Adhesion Molecule-1                  | <i>VCAM1</i>     | 8%  |
| <b>227</b> | Vascular Endothelial Growth Factor                 | <i>VEGFA</i>     | 7%  |
| <b>228</b> | Vascular Endothelial Growth Factor C               | <i>VEGFC</i>     | 10% |
| <b>229</b> | Vascular endothelial growth factor D               | <i>FIGF</i>      | 7%  |
| <b>230</b> | Vascular Endothelial Growth Factor Receptor 2      | <i>FLT1</i>      | 6%  |
| <b>231</b> | Vascular endothelial growth factor receptor 3      | <i>FLT4</i>      | 7%  |
| <b>232</b> | Visceral adipose tissue derived serpin A12         | <i>SERPINA12</i> | 7%  |
| <b>233</b> | Visfatin                                           | <i>NAMPT</i>     | 15% |
| <b>234</b> | Vitamin D-Binding Protein                          | <i>GC</i>        | 11% |
| <b>235</b> | Vitamin K-Dependent Protein S                      | <i>PROS1</i>     | 9%  |
| <b>236</b> | Vitronectin                                        | <i>VTN</i>       | 18% |
| <b>237</b> | von Willebrand Factor                              | <i>VWF</i>       | 12% |
| <b>238</b> | YKL-40                                             | <i>CHI3L1</i>    | 8%  |

The respective CVs are from the customized validation report provided by Myriad RBM Inc. for the biomarkers assayed for this study (15); the company's White Paper on Quality systems was accessed at <https://myriadrbm.com/scientific-media/quality-control-systems-white-paper/>.

SUPPLEMENTARY DATA

**Supplementary Table 3. Characteristics of ORIGIN participants**

| <b>Variables</b>                        | <b>Proteomic study participants (n=8197)</b> | <b>Genetic study participants (n=4147)</b> |
|-----------------------------------------|----------------------------------------------|--------------------------------------------|
| Age (years)                             | 63.72 (7.94)                                 | 63.45 (7.98)                               |
| Sex (% male)                            | 66.11                                        | 64.14                                      |
| Ethnicity - Europeans (%)               | 55.41                                        | 46.56                                      |
| - Latin Americans (%)                   | 34.28                                        | 53.44                                      |
| - South Asian (%)                       | 5.49                                         | -                                          |
| - Black (%)                             | 4.36                                         | -                                          |
| - South East Asian (%)                  | 0.46                                         | -                                          |
| Smoking (% ever)                        | 60.10                                        | 60.16                                      |
| Body mass index (kg/m <sup>2</sup> )    | 30.04 (5.27)                                 | 30.45 (5.33)                               |
| Prior type 2 diabetes (%)               | 81.66                                        | 87.56                                      |
| Fasting plasma glucose (mmol/L)         | 7.33 (2.02)                                  | 7.58 (2.17)                                |
| HbA <sub>1c</sub> (%)                   | 6.5 (0.95)                                   | 6.6 (0.98)                                 |
| (mmol/mol)                              | 48.0 (10.4)                                  | 49.0 (10.7)                                |
| Prior hypertension (% yes)              | 78.91                                        | 82.9                                       |
| LDL (mmol/L)                            | 2.89 (1.03)                                  | 3.07 (1.05)                                |
| HDL (mmol/L)                            | 1.18 (0.32)                                  | 1.17 (0.32)                                |
| Triglycerides (mmol/L)                  | 1.89 (1.24)                                  | 1.93 (1.17)                                |
| Prior cardio-vascular event (% yes)     | 59.57                                        | 53.29                                      |
| ACE inhibitor usage at baseline (% yes) | 57.59                                        | 63.25                                      |

Data are presented as mean (SD) unless stated otherwise.

SUPPLEMENTARY DATA

**Supplementary Table 4. Single nucleotide polymorphisms associated with ACE serum levels and included in the Mendelian randomization analysis of type 2 diabetes risk**

| Biomarker | Gene | SNP         | Genomic position | Effect/Other allele | EAF Europeans (ORIGIN, n=1931) | EAF Latin Americans (ORIGIN, n=2216) | Regression coefficient (se) of ACE level per allele | P-value                 | Proportion of variance explained of ACE level | F-statistic | OR (95%CI) for type 2 diabetes per allele | P-value               |
|-----------|------|-------------|------------------|---------------------|--------------------------------|--------------------------------------|-----------------------------------------------------|-------------------------|-----------------------------------------------|-------------|-------------------------------------------|-----------------------|
| ACE       | ACE  | rs4343      | 17:61566031      | A/G                 | 0.45                           | 0.46                                 | -0.63 (0.02)                                        | 1.53x10 <sup>-213</sup> | 0.21                                          | 64.23       | 0.97 (0.94-0.99)                          | 0.01                  |
|           |      | rs1074637   | 17:61442830      | T/C                 | 0.90                           | 0.91                                 | -0.24 (0.04)                                        | 4.40x10 <sup>-9</sup>   | 0.01                                          | 2.03        | 1.00 (0.96-1.05)                          | 0.86                  |
|           |      | rs11650201  | 17:61544349      | G/T                 | 0.16                           | 0.18                                 | -0.28 (0.03)                                        | 2.69x10 <sup>-18</sup>  | 0.02                                          | 4.49        | 0.97 (0.94-1.02)                          | 0.21                  |
|           |      | rs117808108 | 17:61641531      | T/C                 | 0.89                           | 0.94                                 | -0.12 (0.04)                                        | 1.13x10 <sup>-3</sup>   | 0.00                                          | 0.62        | 1.04 (1.00-1.08)                          | 0.068                 |
|           |      | rs12452187  | 17:61648920      | A/G                 | 0.60                           | 0.61                                 | -0.23 (0.02)                                        | 2.53x10 <sup>-27</sup>  | 0.03                                          | 6.96        | 0.97 (0.94-0.99)                          | 0.012                 |
|           |      | rs12602457  | 17:61330017      | G/T                 | 0.85                           | 0.89                                 | -0.23 (0.03)                                        | 2.64x10 <sup>-14</sup>  | 0.01                                          | 3.41        | 0.99 (0.95-1.03)                          | 0.59                  |
|           |      | rs13342595  | 17:61488575      | C/T                 | 0.23                           | 0.24                                 | -0.14 (0.02)                                        | 2.48x10 <sup>-9</sup>   | 0.01                                          | 2.10        | 0.98 (0.95-1.01)                          | 0.17                  |
|           |      | rs1443431   | 17:61373314      | A/G                 | 0.03                           | 0.04                                 | -0.24 (0.05)                                        | 4.20x10 <sup>-6</sup>   | 0.01                                          | 1.24        | 1.02 (0.96-1.08)                          | 0.58                  |
|           |      | rs2137143   | 17:61805401      | T/G                 | 0.96                           | 0.98                                 | -0.35 (0.06)                                        | 7.50x10 <sup>-9</sup>   | 0.01                                          | 1.97        | 0.97 (0.92-1.02)                          | 0.28                  |
|           |      | rs4313      | 17:61561017      | C/T                 | 0.96                           | 0.04                                 | -0.24 (0.05)                                        | 1.53x10 <sup>-5</sup>   | 0.00                                          | 1.10        | 1.02 (0.97-1.09)                          | 0.43                  |
|           |      | rs4968780   | 17:61538867      | C/A                 | 0.05                           | 0.06                                 | -0.28 (0.05)                                        | 1.86x10 <sup>-8</sup>   | 0.01                                          | 1.86        | 0.96 (0.91-1.02)                          | 0.23                  |
|           |      | rs71377703  | 17:61765115      | C/T                 | 0.90                           | 0.86                                 | -0.18 (0.04)                                        | 1.07x10 <sup>-6</sup>   | 0.01                                          | 1.40        | 0.94 (0.88-1.00)                          | 0.042                 |
|           |      | rs72845888  | 17:61667008      | T/C                 | 0.05                           | 0.03                                 | -0.26 (0.05)                                        | 1.50x10 <sup>-7</sup>   | 0.01                                          | 1.62        | 0.90 (0.86-0.95)                          | 9.60x10 <sup>-5</sup> |
|           |      | rs72847305  | 17:61741113      | A/G                 | 0.10                           | 0.09                                 | -0.33 (0.04)                                        | 4.52x10 <sup>-17</sup>  | 0.02                                          | 4.17        | 0.95 (0.90-0.99)                          | 0.025                 |
|           |      | rs74251225  | 17:61365909      | G/A                 | 0.04                           | 0.13                                 | -0.26 (0.04)                                        | 1.57x10 <sup>-10</sup>  | 0.01                                          | 2.41        | 0.93 (0.84-1.03)                          | 0.16                  |
|           |      | rs75457471  | 17:61848360      | A/G                 | 0.38                           | 0.40                                 | -0.19 (0.02)                                        | 8.10x10 <sup>-15</sup>  | 0.01                                          | 3.55        | 0.98 (0.94-1.01)                          | 0.22                  |
|           |      | rs79480822  | 17:61654225      | C/T                 | 0.93                           | 0.97                                 | -0.55 (0.05)                                        | 6.37x10 <sup>-24</sup>  | 0.02                                          | 6.03        | 0.95 (0.89-1.01)                          | 0.071                 |

SNP: single nucleotide polymorphism, EAF: effect allele frequency, SE: standard error, OR: odd ratio, CI: confidence interval.

The proportion of variance explained for each SNPs was calculated as follows:  $R^2 = \frac{(2\beta^2 \text{EAF}(1 - \text{EAF}))}{(2\beta^2 \text{EAF}(1 - \text{EAF})) + (\frac{\text{SE}^2}{2N * \text{EAF}(1 - \text{EAF}))}$

The F-statistic for each SNP was calculated as follows:  $F = \frac{N - k - 1}{k} * \frac{R^2}{1 - R^2}$

Where β was the regression coefficient, EAF the effect allele frequency, se the standard error, N the sample size, k the number of SNPs.

The total variance explained by the 17 SNPs was calculated by summing the variance explained by each SNP.

The total F-statistic was calculated from the total variance explained according to the aforementioned equation.

SUPPLEMENTARY DATA

**Supplementary Table 5. Characteristics of UK Biobank participants**

| <b>Variables</b>                     | <b>Participants (n= 341,872)</b> |
|--------------------------------------|----------------------------------|
| Age (years)                          | 56.87 (8.00)                     |
| Sex (% male)                         | 46.18                            |
| Body mass index (kg/m <sup>2</sup> ) | 27.39 (4.75)                     |
| Type 2 diabetes (%)                  | 4.77                             |
| Mean arterial blood pressure (mmHg)  | 101.55 (12.46)                   |
| Fasting plasma glucose (mmol/L)      | 5.12 (1.21)                      |
| HbA1c (mmol/mol)                     | 35.93 (6.49)                     |
| ACE inhibitor usage at baseline (%)  | 10.07                            |

Data are presented as mean (SD) unless stated otherwise.

SUPPLEMENTARY DATA

**Supplementary Table 6. MR associations of ACE concentrations with body mass index and 15 glucose- and insulin-related traits available in the GIANT (16) and the MAGIC consortia (17)(18)(19)(20)**

| Trait                                                                     | Sample size | Unit                    | Beta coefficient per 1 SD lower genetically determined ACE level | 95% Lower CI | 95% Upper CI | P-value               | Number of <i>cis</i> ACE SNPs | Author       | Minimum effect size detectable for a P-value < 0.05 and a power of 80% |
|---------------------------------------------------------------------------|-------------|-------------------------|------------------------------------------------------------------|--------------|--------------|-----------------------|-------------------------------|--------------|------------------------------------------------------------------------|
| Body mass index                                                           | 339224      | SD (kg/m <sup>2</sup> ) | -0.0177                                                          | -0.028       | -0.0074      | 7.42x10 <sup>-4</sup> | 6                             | Locke AE     | 0.002                                                                  |
| Insulin at 30 minutes during oral glucose tolerance test                  | 4483        | SD                      | -0.0870                                                          | -0.1467      | -0.0273      | 0.0043                | 7                             | Prokopenko I | 0.016                                                                  |
| Insulin sensitivity index (ISI)                                           | 4769        | SD                      | 0.0701                                                           | 0.0108       | 0.1294       | 0.0206                | 7                             | Prokopenko I | 0.016                                                                  |
| Fasting proinsulin                                                        | 10701       | log pmol/L              | -0.0244                                                          | -0.0495      | 0.0008       | 0.0573                | 8                             | Dupuis J     | 0.011                                                                  |
| Insulin disposition index (IDI) during oral glucose tolerance test        | 5130        | SD                      | 0.0529                                                           | -0.0023      | 0.1081       | 0.0603                | 7                             | Prokopenko I | 0.015                                                                  |
| Glycated hemoglobin                                                       | 46368       | %                       | -0.0091                                                          | -0.024       | 0.0058       | 0.229                 | 9                             | Soranzo N    | 0.005                                                                  |
| Incremental insulin at 30 minutes adjusted for insulin sensitivity index  | 4789        | SD                      | 0.0324                                                           | -0.0265      | 0.0913       | 0.2812                | 7                             | Prokopenko I | 0.016                                                                  |
| Corrected insulin response during oral glucose tolerance test             | 4447        | SD                      | -0.0355                                                          | -0.1066      | 0.0356       | 0.3277                | 8                             | Prokopenko I | 0.016                                                                  |
| Insulin secretion                                                         | 4789        | SD                      | 0.0230                                                           | -0.0333      | 0.0792       | 0.4242                | 7                             | Prokopenko I | 0.016                                                                  |
| Fasting insulin                                                           | 38238       | log pmol/L              | -0.0052                                                          | -0.0207      | 0.0103       | 0.5112                | 8                             | Dupuis J     | 0.006                                                                  |
| Homeostatic model assessment for beta-cell function (HOMA-B)              | 46186       | log HOMA                | -0.0028                                                          | -0.0155      | 0.0099       | 0.6672                | 8                             | Dupuis J     | 0.005                                                                  |
| Area under the curve of insulin levels during oral glucose tolerance test | 4324        | SD (mU*min/l)           | -0.0115                                                          | -0.0851      | 0.0621       | 0.7591                | 8                             | Prokopenko I | 0.017                                                                  |
| Fasting glucose                                                           | 46186       | mmol/L                  | 0.0013                                                           | -0.0114      | 0.0141       | 0.8397                | 8                             | Dupuis J     | 0.005                                                                  |
| Ratio of the area under the curve for insulin and glucose levels          | 4213        | SD                      | 0.0038                                                           | -0.0704      | 0.078        | 0.9204                | 8                             | Prokopenko I | 0.017                                                                  |
| 2 hour glucose adjusted for BMI                                           | 15234       | mmol/L                  | 0.0014                                                           | -0.0508      | 0.0537       | 0.9568                | 7                             | Saxena R     | 0.009                                                                  |
| Homeostatic model assessment for insulin resistance (HOMA-IR)             | 46186       | log HOMA                | -0.0004                                                          | -0.0163      | 0.0156       | 0.9642                | 8                             | Dupuis J     | 0.005                                                                  |



SUPPLEMENTARY DATA

Part 3 - Additional figures

Supplementary Figure 1. Association of ACE GRS with ACE serum levels in ORIGIN participants

Scatter plot represents individual data point of ORIGIN participants, with ACE GRS plotted in x-axis and ACE serum levels plotted in Y-axis. The line represents the regression line of the association of ACE GRS with ACE serum levels. Equation of the regression line is shown on the top of the figure.

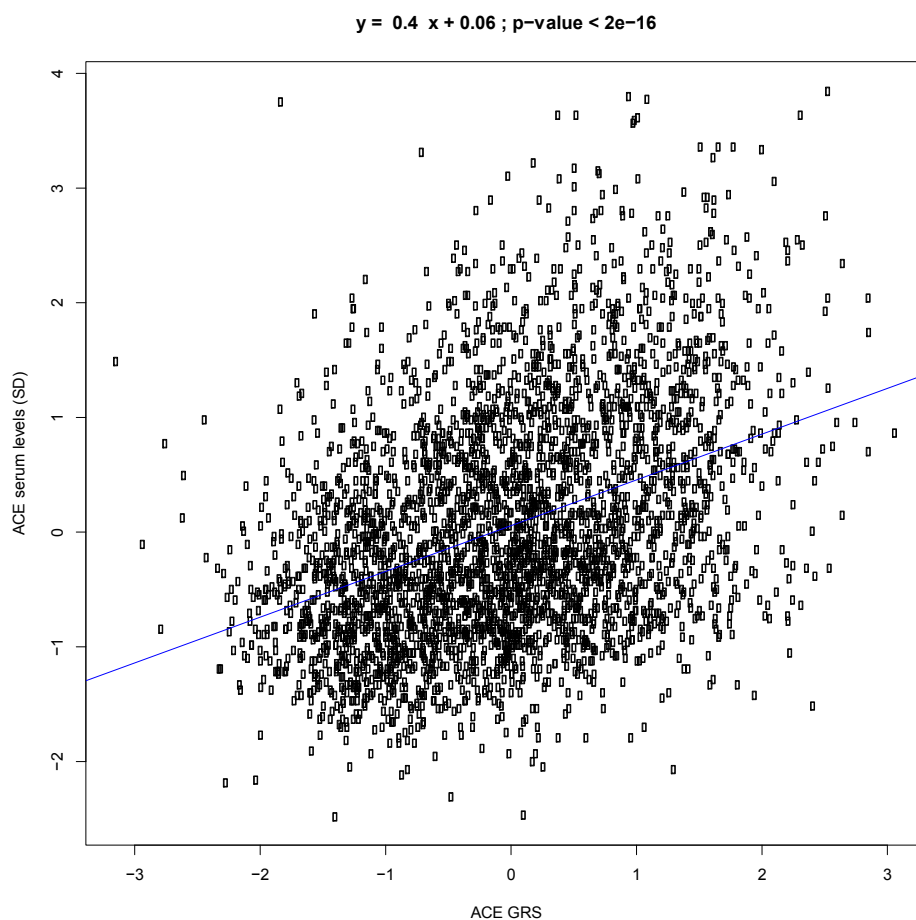

SUPPLEMENTARY DATA

**Supplementary Figure 2. Association of ACE concentration change with risk of type 2 diabetes using a two-sample MR**

Forest plots depict a summary of the MR results for ACE. A single SNP MR was conducted for each independent SNP (pairwise  $r^2 < 0.1$ ) using the same method as described for the multi-SNP MR. ORs were determined by the Wald method by regressing the effect estimates from the type 2 diabetes association (from DIAGRAM) on the ACE association (from ORIGIN). A two-tailed p-value was calculated using a Z-test from 100,000 random simulations.

| ACE level-lowering SNPs | OR (95% CI) of type 2 diabetes risk |
|-------------------------|-------------------------------------|
| rs4343                  | 0.95 (0.91, 0.99)                   |
| rs1074637               | 1.02 (0.84, 1.23)                   |
| rs11650201              | 0.91 (0.79, 1.06)                   |
| rs117808108             | 1.37 (0.93, 2.01)                   |
| rs12452187              | 0.86 (0.77, 0.97)                   |
| rs12602457              | 0.95 (0.80, 1.13)                   |
| rs13342595              | 0.87 (0.72, 1.07)                   |
| rs1443431               | 1.08 (0.83, 1.40)                   |
| rs2137143               | 0.92 (0.79, 1.07)                   |
| rs4313                  | 1.11 (0.86, 1.42)                   |
| rs4968780               | 0.87 (0.70, 1.09)                   |
| rs71377703              | 0.71 (0.49, 1.02)                   |
| rs72845888              | 0.69 (0.54, 0.87)                   |
| rs72847305              | 0.85 (0.73, 0.99)                   |
| rs74251225              | 0.75 (0.51, 1.13)                   |
| rs75457471              | 0.89 (0.73, 1.08)                   |
| rs79480822              | 0.90 (0.81, 1.01)                   |
| <b>Overall</b>          | <b>0.92 (0.89, 0.95)</b>            |

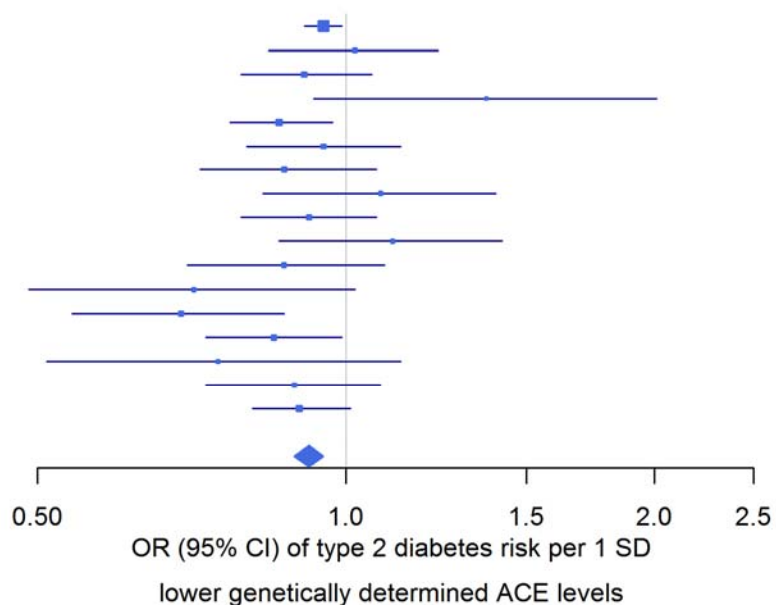

SUPPLEMENTARY DATA

**Supplementary Figure 3. Forest plot of the association of ACE inhibitors and new-onset type 2 diabetes (T2D) risk**

Odds ratio was estimated using inverse variance weighted random effects model (RE model). Heterogeneity was assessed using restricted maximum likelihood estimation (REML).

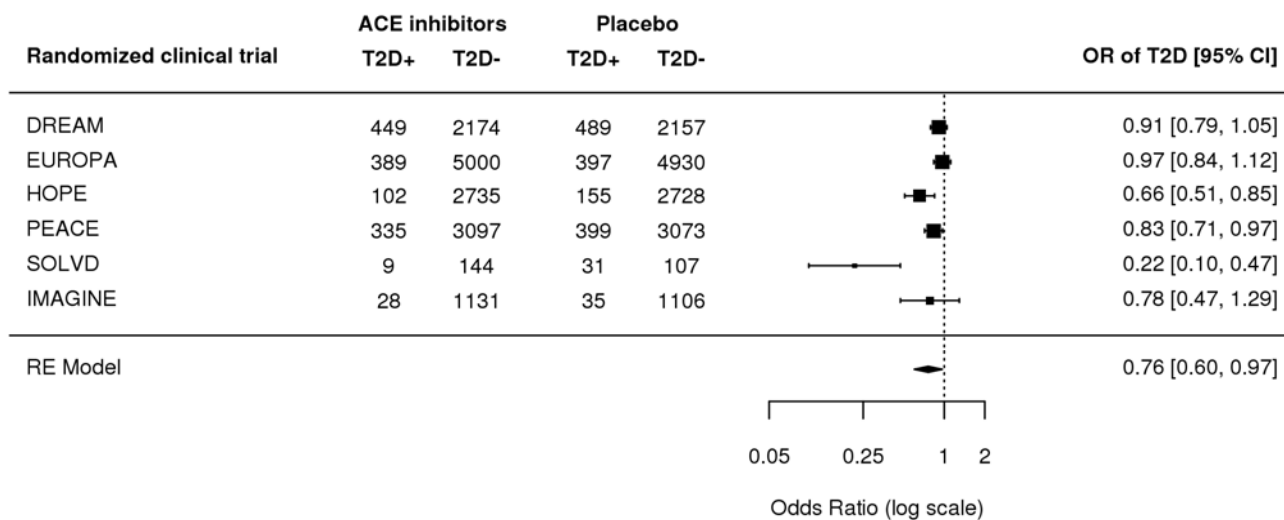

tau<sup>2</sup> (estimated amount of total heterogeneity) : 0.0653 (se= 0.0554)

I<sup>2</sup> (total heterogeneity / total variability) : 85.61%

H<sup>2</sup> (total variability / sampling variability) : 6.95

Test for heterogeneity: Q= 19.6789, p-value= 0.0014

## SUPPLEMENTARY DATA

### References

1. Purcell S, Neale B, Todd-Brown K, Thomas L, Ferreira MAR, Bender D, et al. PLINK: a tool set for whole-genome association and population-based linkage analyses. *Am J Hum Genet.* 2007 Sep;81(3):559–75.
2. Yang J, Lee SH, Goddard ME, Visscher PM. GCTA: a tool for genome-wide complex trait analysis. *Am J Hum Genet.* 2011 Jan 7;88(1):76–82.
3. Howie BN, Donnelly P, Marchini J. A flexible and accurate genotype imputation method for the next generation of genome-wide association studies. *PLoS Genet.* 2009 Jun;5(6):e1000529.
4. 1000 Genomes Project Consortium, Auton A, Brooks LD, Durbin RM, Garrison EP, Kang HM, et al. A global reference for human genetic variation. *Nature.* 2015 Oct 1;526(7571):68–74.
5. O'Connell J, Sharp K, Shrine N, Wain L, Hall I, Tobin M, et al. Haplotype estimation for biobank-scale data sets. *Nat Genet.* 2016 Jul;48(7):817–20.
6. Huang J, Howie B, McCarthy S, Memari Y, Walter K, Min JL, et al. Improved imputation of low-frequency and rare variants using the UK10K haplotype reference panel. *Nat Commun.* 2015 Sep;6:8111–8111.
7. Viechtbauer W. Confidence intervals for the amount of heterogeneity in meta-analysis. *Stat Med.* 2007 Jan 15;26(1):37–52.
8. DREAM Trial Investigators, Bosch J, Yusuf S, Gerstein HC, Pogue J, Sheridan P, et al. Effect of ramipril on the incidence of diabetes. *N Engl J Med.* 2006 Oct 12;355(15):1551–62.
9. Fox KM, EUROpean trial On reduction of cardiac events with Perindopril in stable coronary Artery disease Investigators. Efficacy of perindopril in reduction of cardiovascular events among patients with stable coronary artery disease: randomised, double-blind, placebo-controlled, multicentre trial (the EUROPA study). *Lancet Lond Engl.* 2003 Sep 6;362(9386):782–8.
10. Yusuf S, Gerstein H, Hoogwerf B, Pogue J, Bosch J, Wolffenbuttel BH, et al. Ramipril and the development of diabetes. *JAMA.* 2001 Oct 17;286(15):1882–5.
11. Braunwald E, Domanski MJ, Fowler SE, Geller NL, Gersh BJ, Hsia J, et al. Angiotensin-converting-enzyme inhibition in stable coronary artery disease. *N Engl J Med.* 2004 Nov 11;351(20):2058–68.
12. Vermes E, Ducharme A, Bourassa MG, Lessard M, White M, Tardif J-C, et al. Enalapril reduces the incidence of diabetes in patients with chronic heart failure: insight from the Studies Of Left Ventricular Dysfunction (SOLVD). *Circulation.* 2003 Mar 11;107(9):1291–6.
13. Chocron S, Baillet R, Rouleau JL, Warnica WJ, Block P, Johnstone D, et al. Impact of previous percutaneous transluminal coronary angioplasty and/or stenting revascularization on outcomes after surgical revascularization: insights from the imagine study. *Eur Heart J.* 2008 Mar;29(5):673–9.
14. Scott RA, Scott LJ, Mägi R, Marullo L, Gaulton KJ, Kaakinen M, et al. An Expanded Genome-Wide Association Study of Type 2 Diabetes in Europeans. *Diabetes.* 2017 Nov 1;66(11):2888–902.
15. Gerstein HC, Paré G, McQueen MJ, Haenel H, Lee SF, Pogue J, et al. Identifying Novel Biomarkers for Cardiovascular Events or Death in People With Dysglycemia. *Circulation.* 2015 Dec 15;132(24):2297–304.
16. Locke AE, Kahali B, Berndt SI, Justice AE, Pers TH, Day FR, et al. Genetic studies of body mass index yield new insights for obesity biology. *Nature.* 2015 Feb 12;518(7538):197–206.
17. Dupuis J, Langenberg C, Prokopenko I, Saxena R, Soranzo N, Jackson AU, et al. New genetic loci implicated in fasting glucose homeostasis and their impact on type 2 diabetes risk. *Nat Genet.* 2010 Feb;42(2):105–16.
18. Prokopenko I, Poon W, Mägi R, Prasad B R, Salehi SA, Almgren P, et al. A central role for GRB10 in regulation of islet function in man. *PLoS Genet.* 2014 Apr;10(4):e1004235.
19. Saxena R, Hivert M-F, Langenberg C, Tanaka T, Pankow JS, Vollenweider P, et al. Genetic variation in GIPR influences the glucose and insulin responses to an oral glucose challenge. *Nat Genet.* 2010 Feb;42(2):142–8.
20. Soranzo N, Sanna S, Wheeler E, Gieger C, Radke D, Dupuis J, et al. Common variants at 10 genomic loci influence hemoglobin A<sub>1c</sub> levels via glycemic and nonglycemic pathways. *Diabetes.* 2010 Dec;59(12):3229–39.
